# Supplementary material
Source: PubMed Central journal article supplement (PMC4500462)
Supplement: jm5016846_si_001.pdf [file jm5016846_si_001.pdf]

## Supplementary Information:

### **The *Clostridium difficile* drug pipeline: challenges in discovery and development of new agents**

Angie M. Jarrad<sup>1</sup>, Tomislav Karoli<sup>1,3</sup>, Mark A. Blaskovich<sup>1</sup>, Dena Lyras<sup>2</sup> and Matthew A. Cooper\*<sup>1</sup>

<sup>1</sup>The Institute for Molecular Bioscience, University of Queensland, St Lucia, Queensland, Australia

<sup>2</sup>School of Biomedical Sciences, Monash University, Clayton, Victoria, Australia

<sup>3</sup>Current address: Progen Pharmaceuticals Limited, Darra, Queensland, Australia

#### **Table of Contents**

|          |                                                                                                       |          |
|----------|-------------------------------------------------------------------------------------------------------|----------|
| <b>1</b> | <b>Method .....</b>                                                                                   | <b>2</b> |
| 1.1      | <b>Chemoinformatic analysis of compounds with antimicrobial activity against <i>C. difficile</i>.</b> | <b>2</b> |
| <b>2</b> | <b>Supplementary Table .....</b>                                                                      | <b>3</b> |
| <b>3</b> | <b>References .....</b>                                                                               | <b>5</b> |

# 1 Method

## 1.1 Chemoinformatic analysis of compounds with antimicrobial activity against *C. difficile*

Compounds with reported antimicrobial activity against *C. difficile* (Target ID: ChEMBL614965) were extracted from ChEMBL (Version 17) database into an Excel spreadsheet. The data was then manually separated into known, marketed antibiotics and research compounds based on the assigned chemical name (MOL\_PREF\_NAME). The activity data was standardized into  $\mu\text{g/mL}$  and molar units, from which pMIC were calculated. PipelinePilot, Accelrys (Version 8.5.0.200) was used to further analyse the data extracted from ChEMBL. Briefly, Pipeline Pilot was used to generate the molecular structure from SMILES. The data was then merged based on the ChEMBL parent ID and pivoted on Standard\_type with pivot value= Standard\_Value . Compounds were clustered by structural similarity using tanimoto distances between FCFP\_4 and ECFP\_6 fingerprints and using the inbuilt partitioning method. The clustering was optimized by visual inspection of the clusters, resulting in a maximum of 14 clusters, and by recentering the clusters twice. The members of each clusters were exported into an Excel worksheet for further analysis, which permitted further adjustment of the clusters. The cluster groups were manually changed for structural outliers, such as if a  $\beta$ -lactam clustered with glycopeptides. The number of compounds in each distinct chemical class was then plotted in order to visualize the chemical space explored for *C. difficile* antimicrobials in the scientific literature.

## 2 Supplementary Table

Supplementary Table 1: Summary of single drug candidates tested against *C. difficile*.

|                                   | No. strains | MIC range (µg/mL) | MIC <sub>50</sub> (µg/mL) | MIC <sub>90</sub> (µg/mL) | Year | Reference |
|-----------------------------------|-------------|-------------------|---------------------------|---------------------------|------|-----------|
| <b>Fluoroquinolones</b>           |             |                   |                           |                           |      |           |
| QA-241                            | 24          | 12.5-25           | 25                        | 25                        | 1989 | 1         |
| BMV40062                          | 17          | 2-8               | 2                         | 8                         | 1989 | 2         |
| Sitafloxacin (DU-6859a)           | 1           | 0.12              |                           |                           | 1997 | 3         |
| CFC-222                           | 13          | 0.39->50          | 3.13                      | 25                        | 1997 | 4         |
| Y-688                             | 12          | ≤0.008 to 1       | 0.5                       | 0.5                       | 1998 | 5         |
| Sitafloxacin (DU-6859a)           | 143         | 0.03-1            | 0.12                      | 0.12                      | 2000 | 6         |
| PGE 9262932                       | 9           | 0.06              | 0.5                       | -                         | 2001 | 7         |
| PGE 9509924                       | 9           | 1                 | 1                         | -                         | 2001 | 7         |
| PGE 4175997                       | 9           | 0.5-1             | 0.5                       | -                         | 2001 | 7         |
| WCK 771                           | 12          | 0.5-4             | 0.5                       | 1                         | 2001 | 8         |
| Delafloxacin (ABT-492)            | 12          | ≤0.015            | ≤0.015                    | ≤0.015                    | 2003 | 9         |
| DX-619                            | 17          | 0.25-32           | 2                         | 2                         | 2005 | 10        |
| DX-619                            | 1           | 0.125             | -                         | -                         | 2006 | 11        |
| DC-159a                           | 15          | 0.25-64           | 2                         | 4                         | 2007 | 12        |
| ACH-702<br>(isothiazoloquinolone) | 10          | 0.25-4            | 0.25                      | 4                         | 2011 | 13        |
| Compound 1 (isothiazolone)        | 10          | 0.25-4            | 0.25                      | 2                         | 2007 | 14        |
| ABT-719 (pyridone)                | 10          | 0.12              | 0.12                      | 0.12                      | 1995 | 15        |
| <b>Carbapenems</b>                |             |                   |                           |                           |      |           |
| BMS-181139                        | 25          | 1-32              | 16                        | 32                        | 1995 | 16        |
| BO-2727 (lenapenem),              | 11          | 0.25-4            | 1                         | 2                         | 1995 | 17        |
| BO-3482                           | 25          | 0.2-0.39          | 0.39                      | 0.39                      | 1997 | 18        |
| J-111,347                         | 21          | 0.5-1             | 1                         | 1                         | 2000 | 19        |
| <b>Cephalosporins</b>             |             |                   |                           |                           |      |           |
| RU 29 246                         | 12          | 0.13-8            | 0.13                      | 8                         | 1992 | 20        |
| FK041                             | 1           | 12.5              | -                         | -                         | 1999 | 21        |
| BMS-247243                        | 2           | 32                | -                         | -                         | 2002 | 22        |
| PPI-0903M (TAK-599)               | 10          | 0.06-8            | 2                         | 4                         | 2005 | 23        |
| <b>Clindamycin</b>                |             |                   |                           |                           |      |           |
| Pirlimycin                        | 5           | 2-500             | -                         | -                         | 1984 | 24        |
| <b>Oxazolidinone</b>              |             |                   |                           |                           |      |           |
| Ranbezolid                        | 10          | 0.03              | 0.03                      | 0.03                      | 2003 | 25        |
| DA-7867                           | 15          | ≤0.06 to 0.25     | 0.12                      | 0.25                      | 2004 | 26        |
| <b>B-lactam</b>                   |             |                   |                           |                           |      |           |
| GV104326 (Sanfetrinem)            | 10          | 1-4               | 2                         | 4                         | 1996 | 27        |
| BMS-180680 (SQ 84,100)            | 12          | >128              | >128                      | >128                      | 1997 | 28        |
| <b>Tetracycline</b>               |             |                   |                           |                           |      |           |
| TBG-MINO                          | 10          | 0.12-1            | 0.5                       | 1                         | 1999 | 29        |
| DMG-MINO                          | 10          | ≤0.06-0.5         | 0.25                      | 0.5                       | 1999 | 29        |
| DMG-DMDOT                         | 10          | ≤0.06-2           | 0.5                       | 2                         | 1999 | 29        |
| <b>Ketolide</b>                   |             |                   |                           |                           |      |           |
| HMR 3647 (RU 66647)               | 10          | 0.06- >64         | 0.25                      | >64                       | 1997 | 30        |
| RU 64004                          | 11          | 0.06- >64         | 0.12                      | >64                       | 1997 | 31        |
| HMR 3004 (RU 64004)               | 10          | 0.06->64          | 0.125                     | >64                       | 1997 | 30        |

|                                    | No. strains | MIC range (µg/mL) | MIC <sub>50</sub> (µg/mL) | MIC <sub>90</sub> (µg/mL) | Year | Reference |
|------------------------------------|-------------|-------------------|---------------------------|---------------------------|------|-----------|
| Telithromycin (HMR 3647; RU 66647) | 14          | 0.06- >32         | 0.25                      | >32                       | 1999 | 32        |
| ABT-773                            | 14          | ≤0.06->32         | 0.125                     | >32                       | 2001 | 33        |
| RBx 14255                          | 28          | 0.125-8           | 0.5                       | 4                         | 2012 | 34        |

### 3 References

- (1) Asahara, M.; Tsuji, A.; Goto, S.; Masuda, K.; Kiuchi, A. *In Vitro* and *In Vivo* Activities of QA-241, a New Tricyclic Quinolone Derivative. *Antimicrobial Agents and Chemotherapy* **1989**, *33*, 1144–1152.
- (2) Fung-Tomc, J.; Desiderio, J. V.; Tsai, Y. H.; Warr, G.; Kessler, R. E. *In Vitro* and *In Vivo* Antibacterial Activities of BMY 40062, a New Fluoronaphthyridone. *Antimicrobial Agents and Chemotherapy* **1989**, *33*, 906–914.
- (3) Spangler, S. K.; Jacobs, M. R.; Appelbaum, P. C. Bactericidal Activity of DU-6859a Compared to Activities of Three Quinolones, Three Beta-Lactams, Clindamycin, and Metronidazole Against Anaerobes as Determined by Time-Kill Methodology. *Antimicrobial Agents and Chemotherapy* **1997**, *41*, 847–849.
- (4) Kim, J. H.; Kang, J. A.; Kim, Y. G.; Kim, J. W.; Lee, J. H.; Choi, E. C.; Kim, B. K. *In Vitro* and *In Vivo* Antibacterial Efficacies of CFC-222, a New Fluoroquinolone. *Antimicrobial Agents and Chemotherapy* **1997**, *41*, 2209–2213.
- (5) MacGowan, A. P.; Bowker, K. E.; Wootton, M.; Holt, H. A.; Reeves, D. S. *In Vitro* Activities of Y-688, a New 7-Substituted Fluoroquinolone, Against Anaerobic Bacteria. *Antimicrobial Agents and Chemotherapy* **1998**, *42*, 419–424.
- (6) Milatovic, D.; Schmitz, F. J.; Brisse, S.; Verhoef, J.; Fluit, A. C. *In Vitro* Activities of Sitafloxacin (DU-6859a) and Six Other Fluoroquinolones Against 8,796 Clinical Bacterial Isolates. *Antimicrobial Agents and Chemotherapy* **2000**, *44*, 1102–1107.
- (7) Barry, A. L.; Fuchs, P. C.; Brown, S. D. *In Vitro* Activities of Three Nonfluorinated Quinolones Against Representative Bacterial Isolates. *Antimicrobial Agents and Chemotherapy* **2001**, *45*, 1923–1927.
- (8) Peric, M.; Jacobs, M. R.; Appelbaum, P. C. Antianaerobic Activity of a Novel Fluoroquinolone, WCK 771, Compared to Those of Nine Other Agents. *Antimicrobial Agents and Chemotherapy* **2004**, *48*, 3188–3192.
- (9) Nilius, A. M.; Shen, L. L.; Hensey-Rudloff, D.; Almer, L. S.; Beyer, J. M.; Balli, D. J.; Cai, Y.; Flamm, R. K. *In Vitro* Antibacterial Potency and Spectrum of ABT-492, a New Fluoroquinolone. *Antimicrobial Agents and Chemotherapy* **2003**, *47*, 3260–3269.
- (10) Fujikawa, K.; Chiba, M.; Tanaka, M.; Sato, K. *In Vitro* Antibacterial Activity of DX-619, a Novel Des-Fluoro(6) Quinolone. *Antimicrobial Agents and Chemotherapy* **2005**, *49*, 3040–3045.
- (11) Tanaka, K.; Mikamo, H.; Nakao, K.; Watanabe, K. *In Vitro* Antianaerobic Activity of DX-619, a New Des-Fluoro(6) Quinolone. *Antimicrobial Agents and Chemotherapy* **2006**, *50*, 3908–3913.
- (12) Hoshino, K.; Inoue, K.; Murakami, Y.; Kurosaka, Y.; Namba, K.; Kashimoto, Y.; Uoyama, S.; Okumura, R.; Higuchi, S.; Otani, T. *In Vitro* and *In Vivo* Antibacterial Activities of DC-159a, a New Fluoroquinolone. *Antimicrobial Agents and Chemotherapy* **2008**, *52*, 65–76.
- (13) Pucci, M. J.; Podos, S. D.; Thanassi, J. A.; Leggio, M. J.; Bradbury, B. J.; Deshpande, M. *In Vitro* and *In Vivo* Profiles of ACH-702, an Isothiazoloquinolone, Against Bacterial Pathogens. **2011**, *55*, 2860–2871.
- (14) Pucci, M. J.; Cheng, J.; Podos, S. D.; Thoma, C. L.; Thanassi, J. A.; Buechter, D. D.; Mushtaq, G.; Vigliotti, G. A.; Bradbury, B. J.; Deshpande, M. *In Vitro* and *In Vivo* Antibacterial Activities of Heteroaryl Isothiazolones Against Resistant Gram-Positive Pathogens. *Antimicrobial Agents and Chemotherapy* **2007**, *51*, 1259–1267.
- (15) Flamm, R. K.; Vojtko, C.; Chu, D. T.; Li, Q.; Beyer, J.; Hensey, D.; Ramer, N.; Clement, J. J.; Tanaka, S. K. *In Vitro* Evaluation of ABT-719, a Novel DNA Gyrase Inhibitor. *Antimicrobial Agents and Chemotherapy* **1995**, *39*, 964–970.
- (16) Kessler, R. E.; Fung-Tomc, J.; Kolek, B.; Minassian, B.; Huczko, E.; Gradelski, E.; Bonner, D. P. *In Vitro* Activity of BMS-181139, a New Carbapenem with Potent Antipseudomonal Activity. *Antimicrobial Agents and Chemotherapy* **1995**, *39*, 380–385.

- (17) Asahi, Y.; Miyazaki, S.; Yamaguchi, K. *In Vitro* and *In Vivo* Antibacterial Activities of BO-2727, a New Carbapenem. *Antimicrobial Agents and Chemotherapy* **1995**, *39*, 1030–1037.
- (18) Adachi, Y.; Nakamura, K.; Kato, Y.; Hazumi, N.; Hashizume, T.; Nakagawa, S. *In Vitro* Evaluation of BO-3482, a Novel Dithiocarbamate Carbapenem with Activity Against Methicillin-Resistant Staphylococci. *Antimicrobial Agents and Chemotherapy* **1997**, *41*, 2282–2285.
- (19) Nagano, R.; Shibata, K.; Adachi, Y.; Imamura, H.; Hashizume, T.; Morishima, H. *In Vitro* Activities of Novel Trans-3,5-Disubstituted Pyrrolidinylthio-1beta-Methylcarbapenems with Potent Activities Against Methicillin-Resistant *Staphylococcus Aureus* And *Pseudomonas Aeruginosa*. *Antimicrobial Agents and Chemotherapy* **2000**, *44*, 489–495.
- (20) Bauernfeind, A.; Jungwirth, R.; Eberlein, E.; Klesel, N.; Adam, F.; Isert, D.; Limbert, M.; Markus, A.; Schrunner, E.; Seibert, G. RU 29 246, the Active Compound of the Cephalosporin-Prodrug-Ester HR 916. I. Antibacterial Activity *In Vitro*. *J. Antibiot.* **1992**, *45*, 505–520.
- (21) Watanabe, Y.; Hatano, K.; Matsumoto, Y.; Tawara, S.; Yamamoto, H.; Kawabata, K.; Takasugi, H.; Matsumoto, F.; Kuwahara, S. *In Vitro* Antibacterial Activity of FK041, a New Orally Active Cephalosporin. *J. Antibiot.* **1999**, *52*, 649–659.
- (22) Clark, J.; Fung-Tomc, J. C.; Minassian, B.; Tsai, Y.-H.; Yang, H.; Huczko, E.; Kolek, B.; Chaniewski, S.; Ferraro, C.; Drain, R.; Gradelski, E.; Bonner, D. P. *In Vitro* and *In Vivo* Activities of a Novel Cephalosporin, BMS-247243, Against Organisms Other Than Staphylococci. *Antimicrobial Agents and Chemotherapy* **2002**, *46*, 1108–1111.
- (23) Helio S Sader, T. R. F. K. K. Y. G. R. N. J. Antibacterial Activity and Spectrum of PPI-0903M (T-91825), a Novel Cephalosporin, Tested Against a Worldwide Collection of Clinical Strains. *Antimicrobial Agents and Chemotherapy* **2005**, *49*, 3501–3512.
- (24) Birkenmeyer, R. D.; Kroll, S. J.; Lewis, C.; Stern, K. F.; Zurenko, G. E. Synthesis and Antibacterial Activity of Clindamycin Analogues: Pirlimycin, 1,2 a Potent Antibacterial Agent. **1984**, *27*, 216–223.
- (25) Ednie, L. M.; Rattan, A.; Jacobs, M. R.; Appelbaum, P. C. Antianaerobe Activity of RBX 7644 (Ranbezolid), a New Oxazolidinone, Compared with Those of Eight Other Agents. *Antimicrobial Agents and Chemotherapy* **2003**, *47*, 1143–1147.
- (26) Yong, D.; Yum, J. H.; Lee, K.; Chong, Y.; Choi, S. H.; Rhee, J. K. *In Vitro* Activities of DA-7867, a Novel Oxazolidinone, Against Recent Clinical Isolates of Aerobic and Anaerobic Bacteria. *Antimicrobial Agents and Chemotherapy* **2004**, *48*, 352–357.
- (27) Wise, R.; Andrews, J. M.; Brenwald, N. *In Vitro* Activity of the Tricyclic Beta-Lactam GV104326. *Antimicrobial Agents and Chemotherapy* **1996**, *40*, 1248–1253.
- (28) Fung-Tomc, J.; Bush, K.; Minassian, B.; Kolek, B.; Flamm, R.; Gradelski, E.; Bonner, D. Antibacterial Activity of BMS-180680, a New Catechol-Containing Monobactam. *Antimicrobial Agents and Chemotherapy* **1997**, *41*, 1010–1016.
- (29) Petersen, P. J.; Jacobus, N. V.; Weiss, W. J.; Sum, P. E.; Testa, R. T. *In Vitro* and *In Vivo* Antibacterial Activities of a Novel Glycylcycline, the 9-T-Butylglycylamido Derivative of Minocycline (GAR-936). *Antimicrobial Agents and Chemotherapy* **1999**, *43*, 738–744.
- (30) Ednie, L. M.; Jacobs, M. R.; Appelbaum, P. C. Comparative Antianaerobic Activities of the Ketolides HMR 3647 (RU 66647) and HMR 3004 (RU 64004). *Antimicrobial Agents and Chemotherapy* **1997**, *41*, 2019–2022.
- (31) Ednie, L. M.; Spangler, S. K.; Jacobs, M. R.; Appelbaum, P. C. Antianaerobic Activity of the Ketolide RU 64004 Compared to Activities of Four Macrolides, Five Beta-Lactams, Clindamycin, and Metronidazole. *Antimicrobial Agents and Chemotherapy* **1997**, *41*, 1037–1041.
- (32) Goldstein, E. J.; Citron, D. M.; Merriam, C. V.; Warren, Y.; Tyrrell, K. Activities of Telithromycin (HMR 3647, RU 66647) Compared to Those of Erythromycin, Azithromycin, Clarithromycin, Roxithromycin, and Other Antibacterial Agents Against

- Unusual Anaerobes. *Antimicrobial Agents and Chemotherapy* **1999**, *43*, 2801–2805.
- (33) Citron, D. M.; Appleman, M. D. Comparative *In Vitro* Activities of ABT-773 Against 362 Clinical Isolates of Anaerobic Bacteria. *Antimicrobial Agents and Chemotherapy* **2001**, *45*, 345–348.
- (34) Kumar, M.; Mathur, T.; Barman, T. K.; Ramkumar, G.; Bhati, A.; Shukla, G.; Kalia, V.; Pandya, M.; Raj, V. S.; Upadhyay, D. J. *In Vitro* and *In Vivo* Activities of the Novel Ketolide RBx 14255 Against *Clostridium difficile*. *Antimicrobial Agents and Chemotherapy* **2012**, *56*, 5986–5989.
